# Supplementary material
Source: HighWire-hosted journal article supplement (http://thorax.bmjjournals.com/highwire/filestream/174050/field_highwire_adjunct_files/5/62185webonlyfig6.pdf)

# Figure F: Age-specific mortality rates for asthma, England & Wales 1958-2004

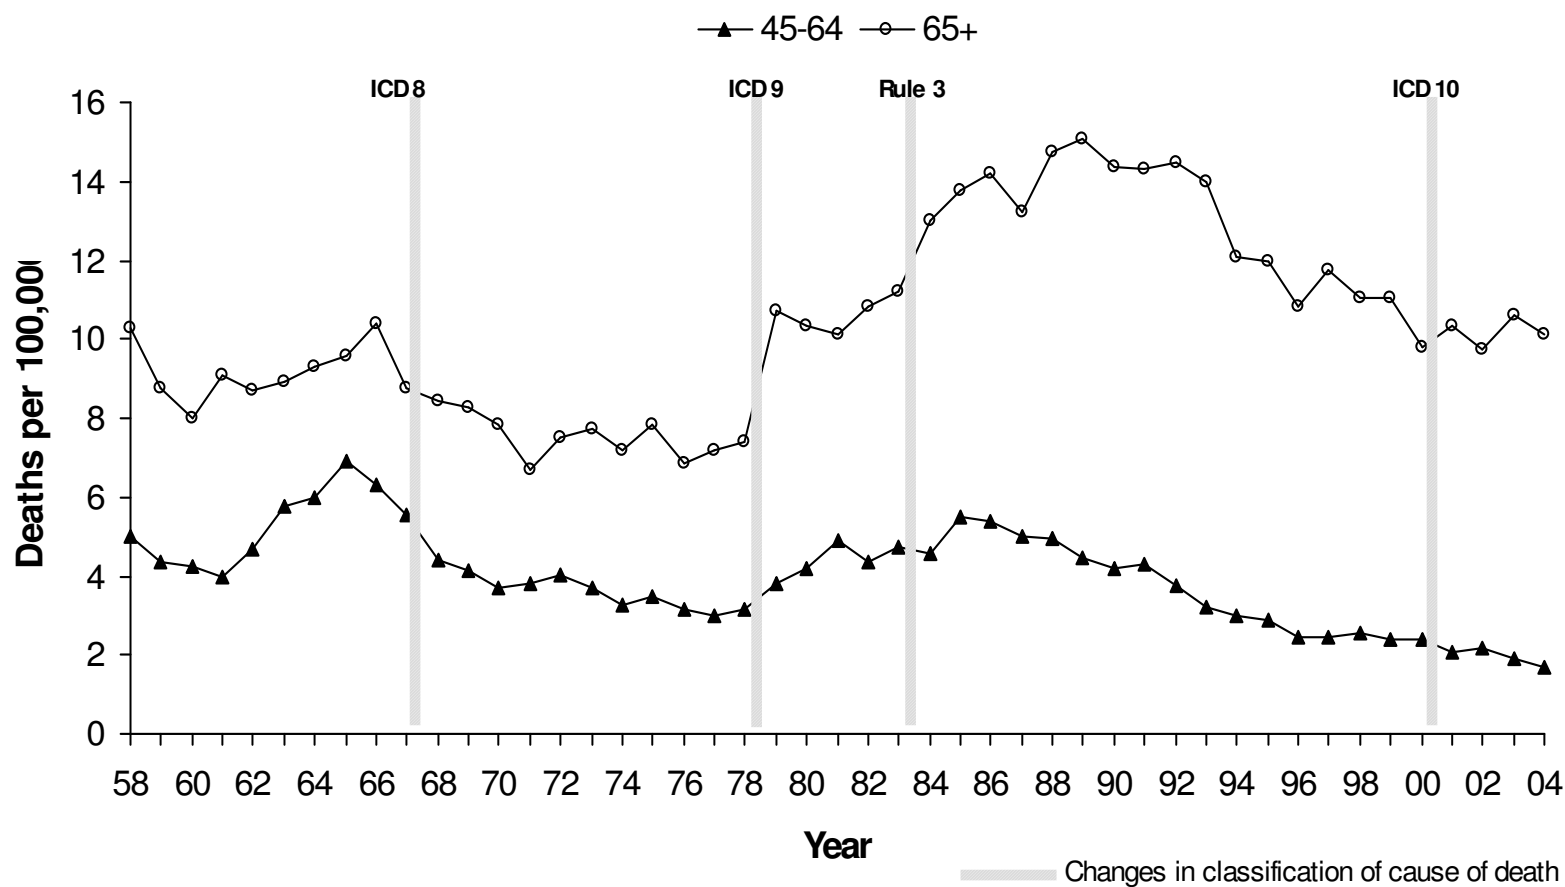

Supplement: 62185webonlyfig6.pdf [file 62185webonlyfig6.pdf]
